# Supplementary material for: Depletion of tRNA-halves enables effective small RNA sequencing of low-input murine serum samples
Source: PubMed Central journal article supplement (PMC5129013; doi:10.1038/srep37876), 2016-11-30
Supplement: srep37876-s1.pdf [file srep37876-s1.pdf]

# Depletion of tRNA-halves enables effective small RNA sequencing of low-input murine serum samples

Alan Van Goethem, Nurten Yigit, Celine Everaert, Myrthala Moreno-Smith, Liselot M. Mus, Eveline Barbieri, Frank Speleman, Pieter Mestdagh, Jason Shohet, Tom Van Maerken, Jo Vandesompele

## Supplementary figure 1:

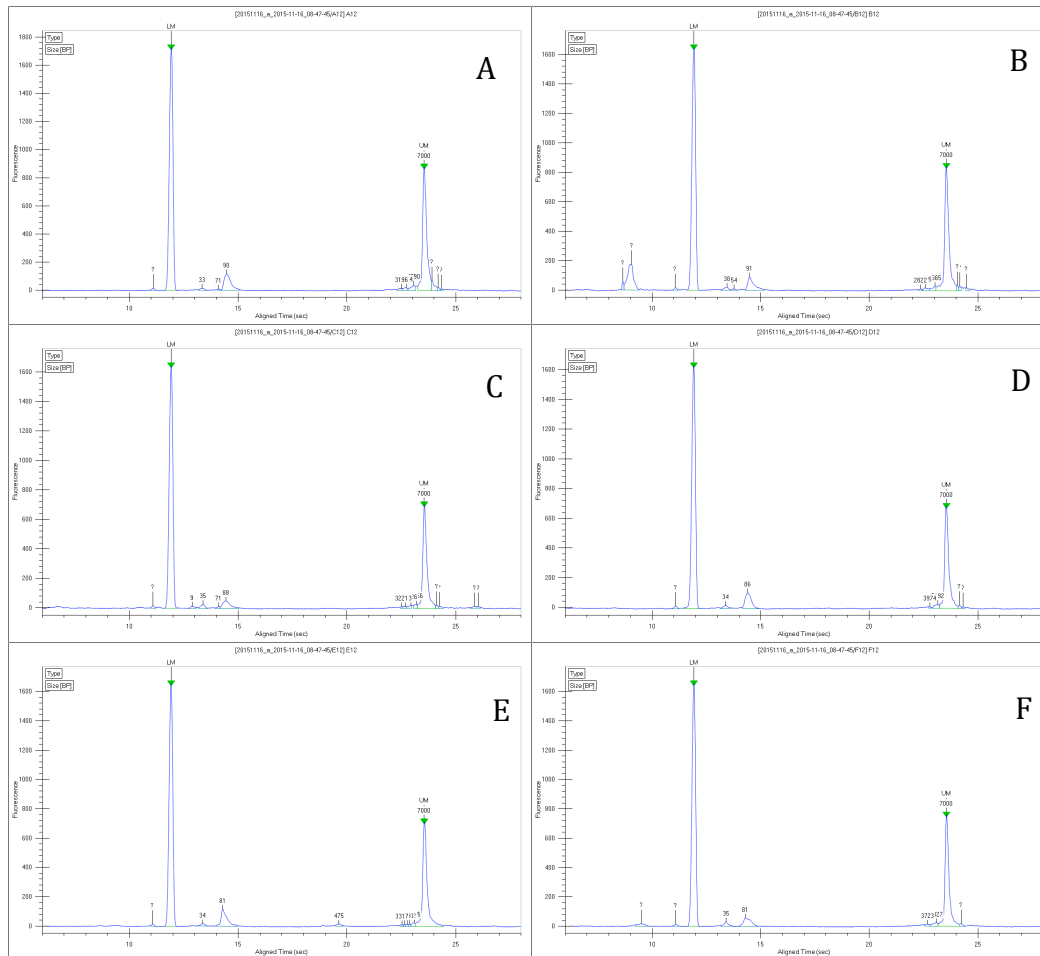

**supplementary figure 2:** PCR amplicon size evaluation by capillary gel electrophoresis. A: tRNA-gly; B: tRNA-his ; C: tRNA-val ; D: tRNA-glu; E: tRNA-gly; F: tRNA-glu.

**Supplementary figure 2:**

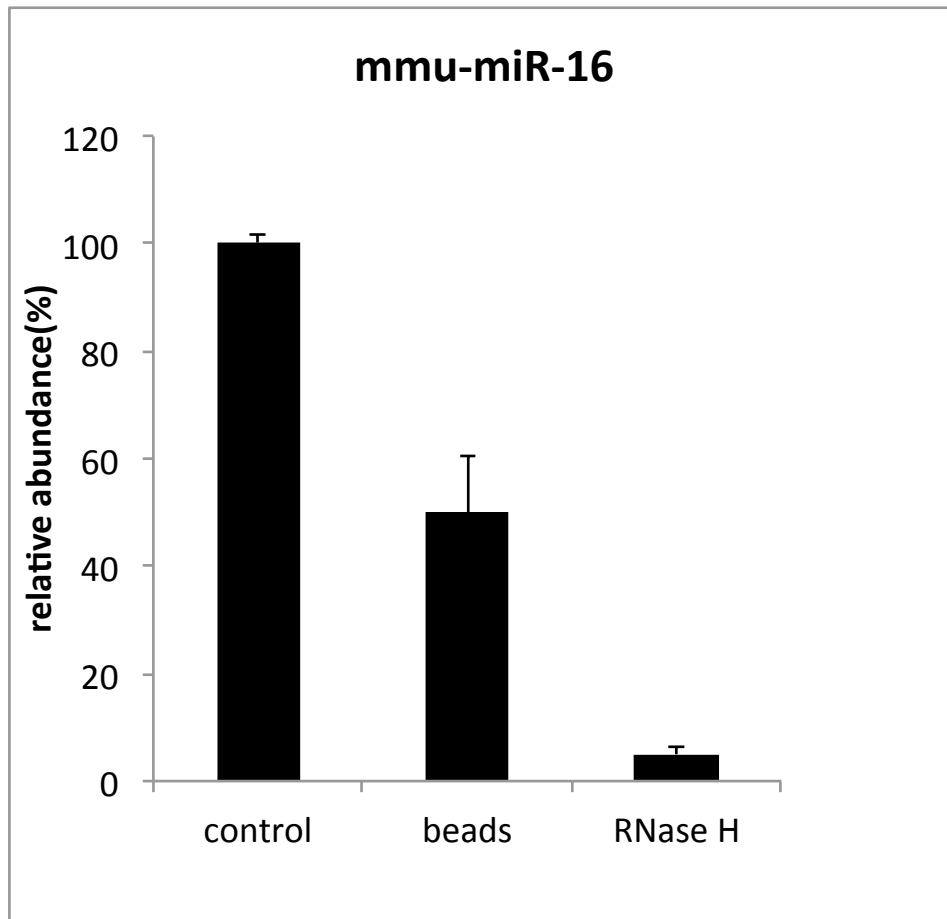

**supplementary figure 3:** Relative abundance of mmu-miR-16 in beads depleted and RNase H depleted murine serum samples, compared to non-depleted control sample.

## Supplementary table 1:

| 5' tRNA half | RNA sequence                              | probe sequence                           | miRNA matches (miRBase v21)                                                                        |
|--------------|-------------------------------------------|------------------------------------------|----------------------------------------------------------------------------------------------------|
| tRNA-glu     | UCCUGGUGGUCUA<br>GUGGUUAGGAUUCG<br>GCG    | CGCCGAATCCTAACCAC<br>TAGACCACCAGGGA      | hsa-miR-4259 (MIMAT0016880)                                                                        |
| tRNA-gly     | GCAUUGGUGGUUCA<br>GUGGUAGAAUUCUC<br>GC    | GCGAGAATTCTACCACT<br>GAACCACCCATGC       | mmu-miR-183-5p (MIMAT0000212),<br>hsa-miR-183-5p (MIMAT0000261),<br>mmu-miR-7046-3p (MIMAT0027997) |
| tRNA-gly     | GCAUUGGUGGUUCA<br>GUGGUAGAAUUCUC<br>GCC   | GGCGAGAATTCTACCACT<br>TGAACCACCAATGC     | mmu-miR-183-5p (MIMAT0000212),<br>hsa-miR-183-5p (MIMAT0000261)                                    |
| tRNA-his     | GGCCGUGAUCGUUAU<br>AGUGGUUAGUACUC<br>UGC  | GCAGAGTACTAACCACCT<br>ATACGATCACGGCC     | no miRNA match                                                                                     |
| tRNA-val     | GUUUCGUGAGUGUA<br>GUGGUUAUCACGUU<br>CGCCU | AGCGAACGTGATAAC<br>CACTACACTACGGA<br>AAC | mmu-miR-471-5p (MIMAT0002112),<br>hsa-miR-3182(MIMAT0015062)                                       |

**supplementary table 1:** Probe sequences used for depletion of serum-derived RNA samples and miRNAs that show (partial) complementarity with the used probes.

## Supplementary table 2:

|                         | primer sequence        |
|-------------------------|------------------------|
| tRNA-gly                | GCTTTGGTGGTTCAGTGGTAG  |
| tRNA-his                | GGCCGTGATCGTATAGTGGT   |
| tRNA-val                | TCCGTAGTGTAGTGGTTATCAC |
| tRNA-glu                | TCCCTGGTGGTCTAGTGGTT   |
| tRNA-gly                | GCATTGGTGGTTCAGTGGTAG  |
| tRNA-glu                | TCCCTGTGGTCTAGTGGTTGA  |
| adaptors TruSeq forward | AATGATACGGCGACCACCGA   |
| adaptors TruSeq reverse | CAAGCAGAAGACGGCATAACGA |

**supplementary table 2:** Primer sequences used for the detection of 5' tRNA halves and the quantification of small RNA sequencing libraries using RT-qPCR.

### Supplementary table 3:

| tRNA     | RNA sequence                               | probe sequence                            | miRNA matches (miRBase v21)                                                                        |
|----------|--------------------------------------------|-------------------------------------------|----------------------------------------------------------------------------------------------------|
| tRNA-glu | UCCUGGGUGGUCUA<br>GUGGUUAGGAUUCG<br>GCG    | CGCCGAATCCTAACC<br>ACTAGACCACCAGGG<br>A   | hsa-miR-4259 (MIMAT0016880)                                                                        |
| tRNA-gly | GCAUGGGGUGGUUCA<br>GUGGUAGAAUUCUC<br>GC    | GCGAGAATTCTACCA<br>CTGAACCACCCATGC        | mmu-miR-183-5p (MIMAT0000212),<br>hsa-miR-183-5p (MIMAT0000261),<br>mmu-miR-7046-3p (MIMAT0027997) |
| tRNA-gly | GCAUUGGGUGGUUCA<br>GUGGUAGAAUUCUC<br>GCC   | GGCGAGAATTCTACC<br>ACTGAACCACCAATG<br>C   | mmu-miR-183-5p (MIMAT0000212),<br>hsa-miR-183-5p (MIMAT0000261)                                    |
| tRNA-his | GGCCGUGAUCGUAU<br>AGUGGUUAGUACUC<br>UGC    | GCAGAGTACTAACCA<br>CTATACGATCACGGC<br>C   | no miRNA match                                                                                     |
| tRNA-val | GUUUCCGUAGUGUA<br>GUGGUUAUCACGUU<br>CGCCU  | AGGCGAACGTGATAA<br>CCACTACACTACGGA<br>AAC | mmu-miR-471-5p (MIMAT0002112),<br>hsa-miR-3182(MIMAT0015062)                                       |
| tRNA-lys | GCCCGCUAGCUCAG<br>UCGGUAGAGCAUGA<br>GACU   | AGTCTCATGCTCTACC<br>GACTGAGCTAGCCGG<br>GC | hsa-miR-6078 (MIMAT0023703),<br>mmu-miR-5106 (MIMAT0020613)                                        |
| tRNA-lys | GUCCAUGCUCUACC<br>GACUGAGCUAGCCG<br>GGC    | GCCCGGCTAGCTCAG<br>TCGGTAGAGCATGGG<br>AC  | hsa-miR-6078 (MIMAT0023703),<br>mmu-miR-5106 (MIMAT0020613)                                        |
| tRNA-met | AGCAGAGUGGCGCA<br>GCGGAAGCGUGCUG<br>GGC    | GCCCAGCACGCTTCC<br>GCTGCGCCACTCTGCT       | no miRNA match                                                                                     |
| tRNA-gln | GGUUCUAUGGUGUA<br>AUGGUUAGCACUCU<br>GGACUC | GAGTCCAGAGTGCTA<br>ACCATTACCCATGG<br>AACC | mmu-miR-6356 (MIMAT0025099),<br>mmu-miR-759 (MIMAT0003897), hsa-<br>miR-759 (MIMAT0010497)         |
| tRNA-arg | GACCCAGUGGCCUAA<br>UGGAUAAGGCAUCA<br>GCCU  | AGGCTGATGCCTTATC<br>CATTAGGCCACTGGG<br>TC | no miRNA match                                                                                     |
| tRNA-pro | GGCUCGUUGGUCUA<br>GGGGUAUGAUUCUC           | GAGAATCATAACCCT<br>AGACCAACGAGCC          | hsa-miR-4448 (MIMAT0018967)                                                                        |

**supplementary table 3:** Depletion probe sequences used for comparing miRNA expression levels in tumor-carrying versus tumor-free mice and miRNAs that show (partial) complementarity with the used probes.

## Supplementary table 4:

| Depleted samples |                 |                 |                 |      |                            |
|------------------|-----------------|-----------------|-----------------|------|----------------------------|
| human miRNA ID   | human miRNA     | murine miRNA ID | murine miRNA    | FC   | sequence                   |
| MIMAT0000062     | hsa-let-7a-5p   | MIMAT0000521    | mmu-let-7a-5p   | 0.56 | UGAGGUAGUAGGUUGUAUAGUU     |
| MIMAT0000068     | hsa-miR-15a-5p  | MIMAT0000526    | mmu-miR-15a-5p  | 0.46 | UAGCAGCACAUAAUGGUUUGUG     |
| MIMAT0000069     | hsa-miR-16-5p   | MIMAT0000527    | mmu-miR-16-5p   | 0.48 | UAGCAGCACGUAAAUAUUGGCG     |
| MIMAT0000081     | hsa-miR-25-3p   | MIMAT0000652    | mmu-miR-25-3p   | 0.51 | CAUUGCACUUGUCUCGGUCUGA     |
| MIMAT0000084     | hsa-miR-27a-3p  | MIMAT0000537    | mmu-miR-27a-3p  | 1.54 | UUCACAGUGGCUAAGUUCGCG      |
| MIMAT0000087     | hsa-miR-30a-5p  | MIMAT0000128    | mmu-miR-30a-5p  | 0.52 | UGUAAACAUCUCGACUGGAAG      |
| MIMAT0000093     | hsa-miR-93-5p   | MIMAT0000540    | mmu-miR-93-5p   | 0.57 | CAAAGUGCUGUUCGUCAGGUA<br>G |
| MIMAT0000099     | hsa-miR-101-3p  | MIMAT0000133    | mmu-miR-101a-3p | 0.54 | UACAGUACUGUGAUACUGAA       |
| MIMAT0000244     | hsa-miR-30c-5p  | MIMAT0000514    | mmu-miR-30c-5p  | 2.05 | UGUAAACAUCUACACUCUCAGC     |
| MIMAT0000424     | hsa-miR-128-3p  | MIMAT0000140    | mmu-miR-128-3p  | 2.13 | UCACAGUGAACGGUCUCUUU       |
| MIMAT0000425     | hsa-miR-130a-3p | MIMAT0000141    | mmu-miR-130a-3p | 1.99 | CAGUGCAAUGUUAAAAGGCAU      |
| MIMAT0000427     | hsa-miR-133a-3p | MIMAT0000145    | mmu-miR-133a-3p | 0.33 | UUUGGUCCCUUCAACCAGCUG      |
| MIMAT0000435     | hsa-miR-143-3p  | MIMAT0000247    | mmu-miR-143-3p  | 0.58 | UGAGAUGAAGCACUGUAGCUC      |
| MIMAT0000436     | hsa-miR-144-3p  | MIMAT0000156    | mmu-miR-144-3p  | 0.33 | UACAGUAUAGAUGAUGUACU       |
| MIMAT0000440     | hsa-miR-191-5p  | MIMAT0000221    | mmu-miR-191-5p  | 2.32 | CAACGGAAUCCAAAAGCAGCUG     |
| MIMAT0000680     | hsa-miR-106b-5p | MIMAT0000386    | mmu-miR-106b-5p | 0.55 | UAAAGUGCUGACAGUGCAGAU      |
| MIMAT0000752     | hsa-miR-328-3p  | MIMAT0000565    | mmu-miR-328-3p  | 2.30 | CUGGCCUCUCUGCCCUUCCGU      |
| MIMAT0000764     | hsa-miR-339-5p  | MIMAT0000584    | mmu-miR-339-5p  | 2.17 | UCCUGUCCUCCAGGAGCUCACG     |
| MIMAT0001340     | hsa-miR-423-3p  | MIMAT0003454    | mmu-miR-423-3p  | 1.78 | AGCUCGGUCUGAGGCCCCUCAGU    |
| MIMAT0001631     | hsa-miR-451a    | MIMAT0001632    | mmu-miR-451a    | 0.44 | AAACCGUUACCAUACUGAGUU      |
| MIMAT0002177     | hsa-miR-486-5p  | MIMAT0014943    | mmu-miR-486b-5p | 0.47 | UCCUGUACUGAGCUGCCCGAG      |
| MIMAT0004586     | hsa-miR-15b-3p  | MIMAT0004521    | mmu-miR-15b-3p  | 0.49 | CGAAUCAUUUUUGCUGCUCUA      |
| MIMAT0004672     | hsa-miR-106b-3p | MIMAT0004582    | mmu-miR-106b-3p | 0.54 | CCGCACUGUGGUUACUUGCUGC     |
| MIMAT0004697     | hsa-miR-151a-5p | MIMAT0004536    | mmu-miR-151-5p  | 2.03 | UCGAGGAGCUCACAGUCUAGU      |
| MIMAT0004703     | hsa-miR-335-3p  | MIMAT0004704    | mmu-miR-335-3p  | 2.45 | UUUUUCAUUUUGCUCUGACC       |
| MIMAT0000763     | hsa-miR-338-3p  | MIMAT0000582    | mmu-miR-338-3p  | 2.01 | UCCAGCAUCAGUGAUUUUGUUG     |
| MIMAT0004762     | hsa-miR-486-3p  | MIMAT0017206    | mmu-miR-486a-3p | 0.51 | CGGGGCAGCUCAGUACAGGAU      |
| MIMAT0000736     | hsa-miR-381-3p  | MIMAT0000746    | mmu-miR-381-3p  | 0.52 | UAUACAAGGGCAAGCUCUCUGU     |
| MIMAT0000432     | hsa-miR-141-3p  | MIMAT0000153    | mmu-miR-141-3p  | 0.50 | UAACACUGUCUGGUAAGAUGG      |
| MIMAT0000067     | hsa-let-7f-5p   | MIMAT0000525    | mmu-let-7f-5p   | 0.65 | UGAGGUAGUAGAUUGUAUAGUU     |
| MIMAT0000757     | hsa-miR-151a-3p | -               | -               | 3.77 | CUAGACUGAAGCUCCUUGAGG      |
| MIMAT0004570     | hsa-miR-223-5p  | -               | -               | 2.02 | CGUGUAUUUGACAAGCUGAGUU     |
| MIMAT0004600     | hsa-miR-144-5p  | -               | -               | 0.47 | GGAUUCAUCAUUAUCUGUAAG      |
| MIMAT0004680     | hsa-miR-130b-5p | -               | -               | 1.97 | ACUCUUUCCUGUUGCACUAC       |
| MIMAT0004951     | hsa-miR-887-3p  | -               | -               | 2.40 | GUGAACGGGCGCCAUCCGAGG      |

|              |                 |              |                 |      |                              |
|--------------|-----------------|--------------|-----------------|------|------------------------------|
| MIMAT0022727 | hsa-miR-1307-5p | -            | -               | 3.06 | UCGACCGGACCUCGACCGGCU        |
| MIMAT0026478 | hsa-miR-133a-5p | -            | -               | 0.35 | AGCUGGUAAAAUGGAACCAAU        |
| -            | -               | MIMAT0000161 | mmu-miR-151-3p  | 1.97 | CUAGACUGAGGCUCCUUGAGG        |
| -            | -               | MIMAT0000569 | mmu-miR-330-3p  | 2.42 | GCAAAGCACAGGGCCUGCAGAGA      |
| -            | -               | MIMAT0000609 | mmu-miR-351-5p  | 1.78 | UCCUGAGGAGCCUUUGAGCCU<br>G   |
| -            | -               | MIMAT0000904 | mmu-miR-215-5p  | 2.28 | AUGACCUAUGAUUUGACAGAC        |
| -            | -               | MIMAT0003473 | mmu-miR-133a-5p | 0.33 | GCUGGUAAAAUGGAACCAAU         |
| -            | -               | MIMAT0004186 | mmu-miR-301b-3p | 2.23 | CAGUGCAAUGGUUUGUCAAAAG<br>C  |
| -            | -               | MIMAT0004532 | mmu-miR-136-3p  | 0.54 | AUCAUCGUCUCAAAUGAGUCUU       |
| -            | -               | MIMAT0004583 | mmu-miR-130b-5p | 1.86 | ACUCUUUCCUGUUGCACUACU        |
| -            | -               | MIMAT0004624 | mmu-miR-15a-3p  | 0.41 | CAGGCCAUACUGUGCUGCCUCA       |
| -            | -               | MIMAT0004628 | mmu-miR-21a-3p  | 1.65 | CAACAGCAGUCGAUGGGCUGUC       |
| -            | -               | MIMAT0004649 | mmu-miR-339-3p  | 2.56 | UGAGCGCCUCGGCAGAGGCCG        |
| -            | -               | MIMAT0004934 | mmu-miR-872-5p  | 1.73 | AAGGUUACUUGUUAGUUCAGG        |
| -            | -               | MIMAT0004935 | mmu-miR-872-3p  | 1.82 | UGAACUUAUUGCAGUAGCCUCCU      |
| -            | -               | MIMAT0009441 | mmu-miR-1968-5p | 2.55 | UGCAGCUGUUAAGGAUGGUGGA<br>CU |
| -            | -               | MIMAT0014836 | mmu-miR-3065-5p | 1.85 | UCAACAAAUCACUGAUGCUGG        |
| -            | -               | MIMAT0014851 | mmu-miR-3071-3p | 0.46 | AUCAUAAAACAAAUGGAGUCC        |
| -            | -               | MIMAT0014944 | mmu-miR-486b-3p | 0.43 | CGGGGCAGCUCAGUACAGGA         |
| -            | -               | MIMAT0016988 | mmu-miR-144-5p  | 0.45 | GGAUUAUCAUCAUUAUCUGUAAG<br>U |
| -            | -               | MIMAT0017018 | mmu-miR-16-2-3p | 0.45 | ACCAUUAUUUUGUGCUCUUU         |
| -            | -               | MIMAT0017056 | mmu-miR-223-5p  | 1.97 | CGUGUAUUUGACAAGCUGAGUU<br>G  |
| -            | -               | MIMAT0017169 | mmu-miR-215-3p  | 2.02 | UCUGUCAUUCUGUAGGCCAAU        |
| -            | -               | MIMAT0020637 | mmu-miR-5126    | 0.43 | GCGGGCGGGGCCGGGGCGGGG        |

### Undepleted samples

| human miRNA ID | human miRNA name | murine miRNA ID | murine miRNA name | FC   | sequence                    |
|----------------|------------------|-----------------|-------------------|------|-----------------------------|
| MIMAT0000068   | hsa-miR-15a-5p   | MIMAT0000526    | mmu-miR-15a-5p    | 0.50 | UAGCAGCACAUAAUGGUUUGUG      |
| MIMAT0000069   | hsa-miR-16-5p    | MIMAT0000527    | mmu-miR-16-5p     | 0.51 | UAGCAGCACGUAAAUAUUGGCG      |
| MIMAT0000081   | hsa-miR-25-3p    | MIMAT0000652    | mmu-miR-25-3p     | 0.54 | CAUUGCACUUGUCUCGGUCUGA      |
| MIMAT0000087   | hsa-miR-30a-5p   | MIMAT0000128    | mmu-miR-30a-5p    | 0.65 | UGUAAACAUCCUCGACUGGAAG      |
| MIMAT0000093   | hsa-miR-93-5p    | MIMAT0000540    | mmu-miR-93-5p     | 0.57 | CAAAGUGCUGUUCGUGCAGGUA<br>G |
| MIMAT0000222   | hsa-miR-192-5p   | MIMAT0000517    | mmu-miR-192-5p    | 1.67 | CUGACCUAUGAAUUGACAGCC       |
| MIMAT0000253   | hsa-miR-10a-5p   | MIMAT0000648    | mmu-miR-10a-5p    | 1.68 | UACCCUGUAGAUCGGAUUUGU<br>G  |
| MIMAT0000424   | hsa-miR-128-3p   | MIMAT0000140    | mmu-miR-128-3p    | 2.21 | UCACAGUGAACCGGUCUCUUU       |
| MIMAT0000425   | hsa-miR-130a-3p  | MIMAT0000141    | mmu-miR-130a-3p   | 2.24 | CAGUGCAAUGUAAAAGGGCAU       |

|              |                 |              |                 |      |                             |
|--------------|-----------------|--------------|-----------------|------|-----------------------------|
| MIMAT0000427 | hsa-miR-133a-3p | MIMAT0000145 | mmu-miR-133a-3p | 0.40 | UUUGGUCCCCUUAACCAGCUG       |
| MIMAT0000435 | hsa-miR-143-3p  | MIMAT0000247 | mmu-miR-143-3p  | 0.63 | UGAGAUGAAGCACUGUAGCUC       |
| MIMAT0000436 | hsa-miR-144-3p  | MIMAT0000156 | mmu-miR-144-3p  | 0.41 | UACAGUAUAGAUGAUGUACU        |
| MIMAT0000440 | hsa-miR-191-5p  | MIMAT0000221 | mmu-miR-191-5p  | 2.49 | CAACGGAAUCCAAAAGCAGCUG      |
| MIMAT0000752 | hsa-miR-328-3p  | MIMAT0000565 | mmu-miR-328-3p  | 2.42 | CUGGCCUCUCUGCCCUUCCGU       |
| MIMAT0001340 | hsa-miR-423-3p  | MIMAT0003454 | mmu-miR-423-3p  | 2.21 | AGCUCGGUCUGAGGCCCCUCAGU     |
| MIMAT0001631 | hsa-miR-451a    | MIMAT0001632 | mmu-miR-451a    | 0.44 | AAACCGUUACCAUUCAGAGUU       |
| MIMAT0002177 | hsa-miR-486-5p  | MIMAT0014943 | mmu-miR-486b-5p | 0.57 | UCCUGUACUGAGCUGCCCCGAG      |
| MIMAT0003218 | hsa-miR-92b-3p  | MIMAT0004899 | mmu-miR-92b-3p  | 2.46 | UAUUGCACUCGUCCCGCCUCC       |
| MIMAT0004597 | hsa-miR-140-3p  | MIMAT0000152 | mmu-miR-140-3p  | 0.66 | UACCACAGGGUAGAACCACGG       |
| -            | -               | MIMAT0000161 | mmu-miR-151-3p  | 2.05 | CUAGACUGAGGCCUCCUUGAGG      |
| -            | -               | MIMAT0000609 | mmu-miR-351-5p  | 2.35 | UCCUGAGGAGCCCUUUGAGCCU<br>G |
| -            | -               | MIMAT0000904 | mmu-miR-215-5p  | 2.27 | AUGACCUAUGAUUUGACAGAC       |
| -            | -               | MIMAT0014944 | mmu-miR-486b-3p | 0.63 | CGGGGCAGCUCAGUACAGGA        |

**supplementary table 4:** miRNAs found differentially expressed in serum samples of mice carrying orthotopic xenografts versus tumor-free mice in depleted and undepleted samples (fold change cut-off = 1.5 ).

### Supplementary table 5:

|                  | <b>3' adapter sequence</b> | <b>5' adapter sequence</b>    |
|------------------|----------------------------|-------------------------------|
| <b>Illumina</b>  | 5' TGGAATTCTCGGGTGCCAAGG   | 5' GUUCAGAGUUCUACAGUCCGACGAUC |
| <b>NEBNext</b>   | 5' AAGATCGGAAGAGCACACGTCT  | 5' GUUCAGAGUUCUACAGUCCGACGAUC |
| <b>TailorMix</b> | 5' TGGAATTCTCGGGTGCCAAGG   | 5' GTTCAGAGTTCTACAGTCCGACGATC |

**supplementary table 5:** 3' and 5' adapter sequences of the TruSeq small RNA library preparation kit v2 (Illumina), the NEBNext Multiplex Small RNA library prep kit (New England Biolabs) and the TailorMix miRNA sample preparation kit v2 (Seqmatic) that were used for the preparation of the small RNA sequencing libraries.

# Supplementary file 1: tRNA-halves depletion protocols

## Beads-based protocol

### 1 hybridize probes and sample

- 1.1 Set heat block to 80 °C.
- 1.2 Add following components:

|                           | high Input | low Input |    |
|---------------------------|------------|-----------|----|
| hybridization buffer (2x) | 100        | 15        | μl |
| tRNA probes (pmol/μl)     | 10         | 1         | μl |
| RNase-free water          |            | 2         | μl |
| RNA sample                | variable   | 12        | μl |
|                           |            | 30        | μl |

each probe = 0.5 μM final concentration, make 2.5 μM worksolutions for the 5 probes

- 1.3 Mix by gentle vortexing and incubate at 80 °C for 2 min to denature RNA.
- 1.4 Transfer tube to cycler and allow to cool over period of 30 min to a temp of 22 °C, slow cooling promotes sequence-specific hybridization (program 0.1 °C/s, and keep 5 min)).
- 1.5 After cooling, briefly centrifuge the tube to collect sample and put on ice.

### 2 washing of beads

- 2.1 Resuspend beads in the vial ( vortex for >30 sec or tilt and rotate for >5min) use the same volume of beads as sample in 1.5.
- 2.2 Transfer the desired amount of beads to a tube.
- 2.3 Add equal volume (or at least 1 ml) of washing buffer (=1X B&W buffer) and resuspend
- 2.4 place tube on magnet for 1 min, discard supernatant.
- 2.5 Remove tube from magnet and resuspend washed beads in the same volume of buffer as initial volume of beads.
- 2.6 Repeat steps 4-5 twice for a total of three washes, after third wash do not resuspend in B&W but continue to step 3.1.

### 3 prepare for RNA manipulation

- 3.1 Wash twice in solution A for 2 min, use same volume of solution A as het volume of beads or larger.
- 3.2 Wash once in solution B for 2 min, use same volume as with solution A.
- 3.3 Resuspend beads in 2x B&W buffer to a final 5 μg/μl concentration.



## 5 immobilization

- 5.1 Add sample to beads from step 4.2 or 3.3 (use the same volume of RNA sample as the volume of the beads).
- 5.2 Incubate at RT for 10 min with gentle mixing.
- 5.3 Briefly spin.
- 5.4 Place on magnet for 2 min.
- 5.5 **CRITICAL STEP:** Collect supernatant.

## 6 ethanol precipitation

- 6.1 Adjust the volume of each sample to 180  $\mu$ l using RNase-free water.
- 6.2 Add 18  $\mu$ l of 3 M sodium acetate to each tube.
- 6.3 Add 2  $\mu$ l of glycogen (10 mg/ml) to each tube and mix by gentle vortexing.
- 6.4 Add 3 volumes (600  $\mu$ l) of ice-cold 100 % ethanol to each tube and mix by gentle vortexing.
- 6.5 Place the tubes at -20 °C for at least 1 hour.
- 6.6 **CRITICAL STEP:** Centrifuge the tubes at > 10000 x g in a microcentrifuge for 30 minutes, carefully remove and discard the supernatant.
- 6.7 Wash the pellet with ice-cold 70 % ethanol and centrifuge at > 10000 x g for 5 minutes, carefully remove and discard the supernatant.
- 6.8 Repeat step 7 for total of two 70% ethanol washes.
- 6.9 **CRITICAL STEP:** Centrifuge briefly to collect any residual supernatant and carefully remove and discard the supernatant.
- 6.10 Allow pellet to air dry at room temperature for 5 minutes.
- 6.11 Dissolve the pellet in RNase-free water or buffer
- 6.12 Place on ice for immediate use, or keep at -20 °C overnight or -65 °C to -80 °C for longterm storage.

## Beads buffers

| hybridization buffer |       |
|----------------------|-------|
| compound             |       |
| tris-HCl             | 0.1 M |
| NaCl                 | 0.2 M |

| solution A        |        |
|-------------------|--------|
| compound          |        |
| DEPC-treated NaOH | 0.1 M  |
| DEPC-treated NaCl | 0.05 M |

| 2x B&W buffer |       |
|---------------|-------|
| compound      |       |
| tris-HCl      | 10 mM |
| EDTA          | 1 mM  |
| NaCl          | 2 M   |

| solution B        |       |
|-------------------|-------|
| compound          |       |
| DEPC-treated NaCl | 0.1 M |

## Rnase H-based protocol

### Hybridization

1. Prepare following mixture:

| low Input                   |            |
|-----------------------------|------------|
| hybridization buffer (7.5x) | 2 $\mu$ l  |
| tRNA probes (pmol/ $\mu$ l) | 1 $\mu$ l  |
| RNA sample                  | 12 $\mu$ l |
|                             | 15 $\mu$ l |

each probe = 0.5  $\mu$ M final concentration, make 2.5  $\mu$ M worksolutions for the 5 probes

2. Mix by pipetting up and down, spin down.
3. Place sample in thermal cycler:

| temp     | duration   |
|----------|------------|
| 80 °C    | 2 min      |
| 80-22 °C | 0.1 °C/sec |
| 22 °C    | 5 min hold |

4. Spin down, place on ice.

### RNase H digestion

5. On ice, prepare following master mix and mix by pipetting up and down:

| component                     | volume    |
|-------------------------------|-----------|
| RNase H                       | 1 $\mu$ l |
| RNase H reaction buffer (10x) | 2 $\mu$ l |
| DTT (0.1 mM)                  | 2 $\mu$ l |

6. Add 5  $\mu$ l of mix to the RNA sample from step 4
7. Mix by pipetting up and down
8. Place samples in thermocycler (lid 40 °C) and incubate at 37 °C for 30 min
9. Spin down and put on ice

### DNase I digestion

10. On ice prepare following mix

|                         |      |         |
|-------------------------|------|---------|
| DNase I reaction buffer | 5    | $\mu$ l |
| DNase I                 | 2.5  | $\mu$ l |
| nuclease-free water     | 22.5 | $\mu$ l |

11. Add 30  $\mu$ l mix to sample from step 9
12. Place in thermocycler (lid 40 °C) and incubate at 37 °C for 30 min
13. Spin down and place on ice

### RNA purification by ethanol precipitation

14. Adjust the volume of each sample to 180  $\mu$ l using RNase-free water.
15. Add 18  $\mu$ l of 3 M sodium acetate to each tube.
16. Add 2  $\mu$ l of glycogen (10 mg/ml) to each tube and mix by gentle vortexing.
17. Add 3 volumes (600  $\mu$ l) of ice-cold 100 % ethanol to each tube and mix by gentle vortexing.
18. Place the tubes at -20 °C for at least 1 hour.
19. **CRITICAL STEP:** Centrifuge the tubes at > 10000 x g in a microcentrifuge for 30 minutes, carefully remove and discard the supernatant.
20. Wash the pellet with ice-cold 70 % ethanol and centrifuge at > 10000 x g for 5 minutes, carefully remove and discard the supernatant.
21. Repeat step 7 for total of two 70% ethanol washes.
22. **CRITICAL STEP:** Centrifuge briefly to collect any residual supernatant and carefully remove and discard the supernatant.
23. Allow pellet to air dry at room temperature for 5 minutes.
24. Dissolve the pellet in RNase-free water or buffer
25. Place on ice for immediate use, or keep at -20 °C overnight or -65 °C to -80 °C for longterm storage.

## Rnase H buffers

| <b>RNase H reaction Buffer:</b> |           |            |   |
|---------------------------------|-----------|------------|---|
| <b>compound</b>                 | <b>1X</b> | <b>10X</b> |   |
| KCl                             | 0,075     | 0,75       | M |
| tris-HCl                        | 0,05      | 0,5        | M |
| MgCl <sub>2</sub>               | 0,003     | 0,03       | M |
| DTT                             | 0,01      | 0,1        | M |

pH 8.3 @ 25 °C

| <b>DNase I buffer</b> |           |            |    |
|-----------------------|-----------|------------|----|
| <b>compound</b>       | <b>1x</b> | <b>10x</b> |    |
| tris-HCl              | 10        | 100        | mM |
| MgCl <sub>2</sub>     | 2,5       | 25         | mM |
| CaCl <sub>2</sub>     | 0,5       | 5          | mM |

pH 7.6 @ 25 °C

| <b>hybridization buffer 2</b> |     |   |  |
|-------------------------------|-----|---|--|
| <b>compound</b>               |     |   |  |
| tris-HCl                      | 0,1 | M |  |
| NaCl                          | 0,2 | M |  |
